# Supplementary material for: Hidden aspects of the Structural theory of chemistry: MC-QTAIM analysis reveals “alchemical” transformation from a triatomic to a diatomic structure
Source: Royal Society of Chemistry journal article supplement (doi:10.1039/c4cp03722g), 2014-10-28
Supplement: c4cp03722g1.pdf [file c4cp03722g1.pdf]

# Supporting Information

## **Hidden aspects of the Structural Theory of chemistry: The MC-QTAIM analysis reveals "alchemical" transformation from a triatomic to a diatomic structure**

Mohammad Goli and Shant Shahbazian\*

*Faculty of Chemistry, Shahid Beheshti University, G. C. , Evin, Tehran, Iran,  
19839, P.O. Box 19395-4716.*

Tel/Fax: 98-21-22431661

E-mail:  
(Shant Shahbazian) [chemist\\_shant@yahoo.com](mailto:chemist_shant@yahoo.com)

\* Corresponding author

## Table of contents

**Page 3:** Table S1- Some results of the topological analysis on the *XCN* series of species including the Gamma density, the combined Lagrangian kinetic energy density (denoted as G), the Laplacian of the Gamma density (denoted as Lap.  $\Gamma$ ), computed at the (3, -3) CP on carbon and nitrogen clamped nuclei and the (3, -1) CP connecting these two CPs. The line between  $m_X = 80m_e$  and  $m_X = 85m_e$  is the border between triatomic and diatomic structures. All results are given in atomic units.

**Page 4:** Table S2- Some results of the topological analysis on the *CNX* series of species including the Gamma density, the combined Lagrangian kinetic energy density (denoted as G), the Laplacian of the Gamma density (denoted as Lap.  $\Gamma$ ), computed at the (3, -3) CP on carbon and nitrogen clamped nuclei and the (3, -1) CP connecting these two CPs. The line between  $m_X = 405m_e$  and  $m_X = 410m_e$  is the border between triatomic and diatomic structures. All results are given in atomic units.

**Page 5:** Table S3- The separate electronic and PCP contributions to the Gamma density, the combined Lagrangian kinetic energy density (denoted as G), the Laplacian of the Gamma density (denoted as Lap.  $\Gamma$ ) all computed at the (3, -3) CP located in the *X* basin and at the (3, -1) linking the (3, -3) CP on carbon nucleus and the (3, -3) CP within the *X* basin the for the *XCN* series of species. All results are given in atomic units.

**Page 6:** Table S4- The separate electronic and PCP contributions to the Gamma density, the combined Lagrangian kinetic energy density (denoted as G), the Laplacian of the Gamma density (denoted as Lap.  $\Gamma$ ) all computed at the (3, -3) CP located in the *X* basin and at the (3, -1) linking the (3, -3) CP on nitrogen nucleus and the (3, -3) CP within the *X* basin for the *CNX* series of species. All results are given in atomic units.

Table S1- Some results of the topological analysis on the  $XCN$  series of species including the Gamma density, the combined Lagrangian kinetic energy density (denoted as G), the Laplacian of the Gamma density (denoted as Lap.  $\Gamma$ ), computed at the (3, -3) CP on carbon and nitrogen clamped nuclei and the (3, -1) CP connecting these two CPs. The line between  $m_X = 80m_e$  and  $m_X = 85m_e$  is the border between triatomic and diatomic structures. All results are given in atomic units.

| $X$ -mass | <i>Gamma</i>     |            |                 | <b>G</b>         |            |                 | <b>Lap. <math>\Gamma</math></b> |            |                 |
|-----------|------------------|------------|-----------------|------------------|------------|-----------------|---------------------------------|------------|-----------------|
|           | <b>N-(3, -3)</b> | <b>LCP</b> | <b>C-(3,-3)</b> | <b>N-(3, -3)</b> | <b>LCP</b> | <b>C-(3,-3)</b> | <b>N-(3, -3)</b>                | <b>LCP</b> | <b>C-(3,-3)</b> |
| 1         | 196.5            | 0.520      | 121.4           | 17.1             | 1.046      | 5.0             | -1476301                        | -0.090     | -670837         |
| 25        | 196.9            | 0.522      | 120.9           | 17.0             | 1.271      | 5.4             | -1480090                        | 0.998      | -667666         |
| 50        | 196.9            | 0.523      | 120.9           | 17.0             | 1.276      | 5.5             | -1480078                        | 1.011      | -667525         |
| 60        | 196.9            | 0.523      | 120.9           | 17.0             | 1.276      | 5.5             | -1480074                        | 1.011      | -667487         |
| 65        | 196.9            | 0.523      | 120.9           | 17.0             | 1.276      | 5.5             | -1480030                        | 1.007      | -667423         |
| 70        | 196.9            | 0.523      | 120.9           | 17.0             | 1.276      | 5.5             | -1480016                        | 1.008      | -667417         |
| 75        | 196.9            | 0.523      | 120.9           | 17.0             | 1.276      | 5.5             | -1480008                        | 1.008      | -667414         |
| 80        | 196.9            | 0.523      | 120.9           | 17.0             | 1.276      | 5.5             | -1480004                        | 1.008      | -667411         |
| 85        | 196.9            | 0.523      | 120.9           | 17.0             | 1.276      | 5.5             | -1479999                        | 1.009      | -667409         |
| 100       | 196.9            | 0.523      | 120.9           | 17.0             | 1.276      | 5.5             | -1479990                        | 1.010      | -667406         |
| 200       | 196.9            | 0.524      | 120.9           | 17.0             | 1.278      | 5.5             | -1479966                        | 1.015      | -667399         |
| 600       | 196.9            | 0.524      | 120.9           | 17.0             | 1.279      | 5.6             | -1479945                        | 1.018      | -667412         |
| 1000      | 196.9            | 0.524      | 120.9           | 17.0             | 1.280      | 5.6             | -1479935                        | 1.019      | -667424         |
| 1400      | 196.9            | 0.524      | 120.9           | 17.0             | 1.280      | 5.6             | -1479931                        | 1.019      | -667434         |
| 1836      | 196.9            | 0.524      | 120.9           | 17.0             | 1.280      | 5.6             | -1479929                        | 1.019      | -667441         |

Table S2- Some results of the topological analysis on the  $CNX$  series of species including the Gamma density, the combined Lagrangian kinetic energy density (denoted as G), the Laplacian of the Gamma density (denoted as Lap.  $\Gamma$ ), computed at the (3, -3) CP on carbon and nitrogen clamped nuclei and the (3, -1) CP connecting these two CPs. The line between  $m_X = 405m_e$  and  $m_X = 410m_e$  is the border between triatomic and diatomic structures. All results are given in atomic units.

| $X$ -mass | $\Gamma$ |       |          | G        |       |          | Lap. $\Gamma$ |       |          |
|-----------|----------|-------|----------|----------|-------|----------|---------------|-------|----------|
|           | C-(3,-3) | LCP   | N-(3,-3) | C-(3,-3) | LCP   | N-(3,-3) | C-(3,-3)      | LCP   | N-(3,-3) |
| 25        | 121.6    | 0.488 | 195.7    | 4.7      | 1.015 | 18.1     | -671651       | 0.210 | -1469770 |
| 50        | 121.6    | 0.486 | 195.6    | 4.6      | 1.016 | 18.2     | -671610       | 0.245 | -1469217 |
| 100       | 121.7    | 0.481 | 195.7    | 4.6      | 1.019 | 18.3     | -672369       | 0.330 | -1470200 |
| 200       | 121.6    | 0.482 | 195.7    | 4.6      | 1.016 | 18.4     | -671676       | 0.301 | -1470216 |
| 300       | 121.6    | 0.481 | 195.7    | 4.6      | 1.016 | 18.4     | -671648       | 0.309 | -1470135 |
| 350       | 121.6    | 0.481 | 195.7    | 4.6      | 1.016 | 18.4     | -671629       | 0.312 | -1470117 |
| 385       | 121.6    | 0.479 | 195.6    | 4.5      | 1.045 | 18.4     | -671897       | 0.487 | -1468964 |
| 400       | 121.6    | 0.479 | 195.6    | 4.5      | 1.045 | 18.4     | -671893       | 0.488 | -1468955 |
| 405       | 121.6    | 0.479 | 195.6    | 4.5      | 1.045 | 18.4     | -671893       | 0.488 | -1468952 |
| 410       | 121.6    | 0.479 | 195.6    | 4.5      | 1.045 | 18.4     | -671894       | 0.489 | -1468950 |
| 425       | 121.6    | 0.479 | 195.6    | 4.5      | 1.045 | 18.5     | -671893       | 0.489 | -1468940 |
| 500       | 121.6    | 0.478 | 195.6    | 4.5      | 1.045 | 18.5     | -671896       | 0.492 | -1468903 |
| 600       | 121.6    | 0.478 | 195.6    | 4.5      | 1.045 | 18.5     | -671893       | 0.496 | -1468862 |
| 1000      | 121.6    | 0.478 | 195.6    | 4.5      | 1.043 | 18.5     | -671906       | 0.502 | -1468815 |
| 1400      | 121.6    | 0.477 | 195.6    | 4.5      | 1.044 | 18.5     | -671911       | 0.506 | -1468767 |
| 1836      | 121.6    | 0.477 | 195.6    | 4.5      | 1.044 | 18.5     | -671916       | 0.509 | -1468737 |

Table S3- The separate electronic and PCP contributions to the Gamma density, the combined Lagrangian kinetic energy density (denoted as G), the Laplacian of the Gamma density (denoted as Lap.  $\Gamma$ ) all computed at the (3, -3) CP located in the *X* basin and at the (3, -1) linking the (3, -3) CP on carbon nucleus and the (3, -3) CP within the *X* basin the for the *XCN* series of species. All results are given in atomic units.

| <b>X-mass</b>     | <b>Gamma*</b>  |                  | <b>G</b>       |                  | <b>Laplacian of Gamma*</b> |                  |
|-------------------|----------------|------------------|----------------|------------------|----------------------------|------------------|
|                   | <b>(3, -1)</b> | <b>X-(3, -3)</b> | <b>(3, -1)</b> | <b>X-(3, -3)</b> | <b>(3, -1)</b>             | <b>X-(3, -3)</b> |
| <b>electronic</b> |                |                  |                |                  |                            |                  |
| 85                | 0.181          | 0.179            | 0.007          | 0.007            | -1.061                     | -1.087           |
| 100               | 0.194          | 0.182            | 0.007          | 0.007            | -1.071                     | -1.288           |
| 200               | 0.226          | 0.211            | 0.007          | 0.008            | -1.207                     | -2.099           |
| 600               | 0.255          | 0.257            | 0.011          | 0.008            | -1.125                     | -3.682           |
| 1000              | 0.263          | 0.276            | 0.012          | 0.009            | -1.067                     | -4.498           |
| 1400              | 0.267          | 0.288            | 0.013          | 0.009            | -1.047                     | -5.046           |
| 1836              | 0.270          | 0.296            | 0.014          | 0.009            | -1.037                     | -5.481           |
| <b>PCP</b>        |                |                  |                |                  |                            |                  |
| 85                | 0.016          | 0.018            | 0.040          | 0.038            | -0.302                     | -0.396           |
| 100               | 0.010          | 0.023            | 0.046          | 0.035            | -0.074                     | -0.730           |
| 200               | 0.002          | 0.028            | 0.038          | 0.038            | 0.133                      | -1.647           |
| 600               | 0.000          | 0.028            | 0.002          | 0.052            | 0.013                      | -3.538           |
| 1000              | 0.000          | 0.027            | 0.000          | 0.062            | 0.001                      | -4.674           |
| 1400              | 0.000          | 0.026            | 0.000          | 0.070            | 0.000                      | -5.519           |
| 1836              | 0.000          | 0.026            | 0.000          | 0.078            | 0.000                      | -6.249           |

\* The PCP's contribution to the Gamma density and its Laplacian is the mass scaled one-particle density and its Laplacian (see section 2 of paper for details).

Table S4- The separate electronic and PCP contributions to the Gamma density, the combined Lagrangian kinetic energy density (denoted as G), the Laplacian of the Gamma density (denoted as Lap.  $\Gamma$ ) all computed at the (3, -3) CP located in the  $X$  basin and at the (3, -1) linking the (3, -3) CP on nitrogen nucleus and the (3, -3) CP within the  $X$  basin for the  $CNX$  series of species. All results are given in atomic units.

| X-mass            | Gamma*  |           | G       |           | Laplacian of Gamma* |           |
|-------------------|---------|-----------|---------|-----------|---------------------|-----------|
|                   | (3, -1) | X-(3, -3) | (3, -1) | X-(3, -3) | (3, -1)             | X-(3, -3) |
| <b>electronic</b> |         |           |         |           |                     |           |
| 410               | 0.255   | 0.254     | 0.018   | 0.018     | -2.566              | -2.594    |
| 425               | 0.258   | 0.253     | 0.018   | 0.018     | -2.544              | -2.697    |
| 500               | 0.267   | 0.257     | 0.018   | 0.018     | -2.605              | -3.005    |
| 600               | 0.276   | 0.263     | 0.018   | 0.018     | -2.703              | -3.328    |
| 1000              | 0.294   | 0.280     | 0.018   | 0.019     | -2.961              | -4.208    |
| 1400              | 0.304   | 0.291     | 0.019   | 0.019     | -3.021              | -4.801    |
| 1836              | 0.311   | 0.299     | 0.020   | 0.019     | -2.913              | -5.279    |
| <b>PCP</b>        |         |           |         |           |                     |           |
| 410               | 0.015   | 0.016     | 0.110   | 0.108     | -0.713              | -0.823    |
| 425               | 0.013   | 0.017     | 0.114   | 0.105     | -0.481              | -1.090    |
| 500               | 0.009   | 0.020     | 0.120   | 0.104     | -0.135              | -1.611    |
| 600               | 0.006   | 0.021     | 0.120   | 0.106     | 0.071               | -2.054    |
| 1000              | 0.003   | 0.022     | 0.099   | 0.119     | 0.319               | -3.163    |
| 1400              | 0.001   | 0.022     | 0.066   | 0.131     | 0.292               | -3.925    |
| 1836              | 0.000   | 0.021     | 0.032   | 0.143     | 0.168               | -4.570    |

\* The PCP's contribution to the Gamma density and its Laplacian is the mass scaled one-particle density and its Laplacian (see section 2 of paper for details).
